# Supplementary material for: Photophysical deactivation behaviour of Rhodamine B using different graphite materials
Source: Royal Society of Chemistry journal article supplement (doi:10.1039/c9ra03325d), 2019-01-01
Supplement: c9ra03325d1.pdf [file c9ra03325d1.pdf]

## Supplementary Information

### Photophysical deactivation behaviour of Rhodamine B by different graphite materials

Varnika Prakash<sup>a</sup>, Rekha Bhar<sup>b</sup>, Shweta Sharma<sup>a</sup> and S.K.Mehta<sup>\*b</sup>

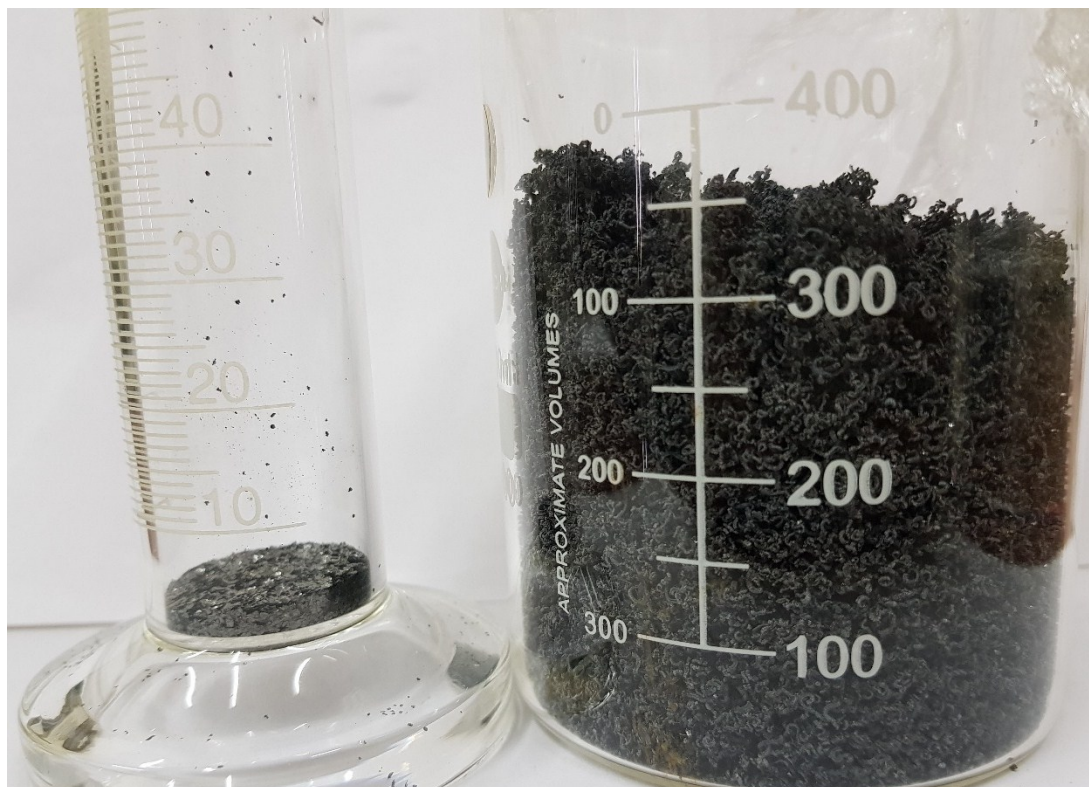

Fig. S1 Photographic image of graphite (left) and EG(right)

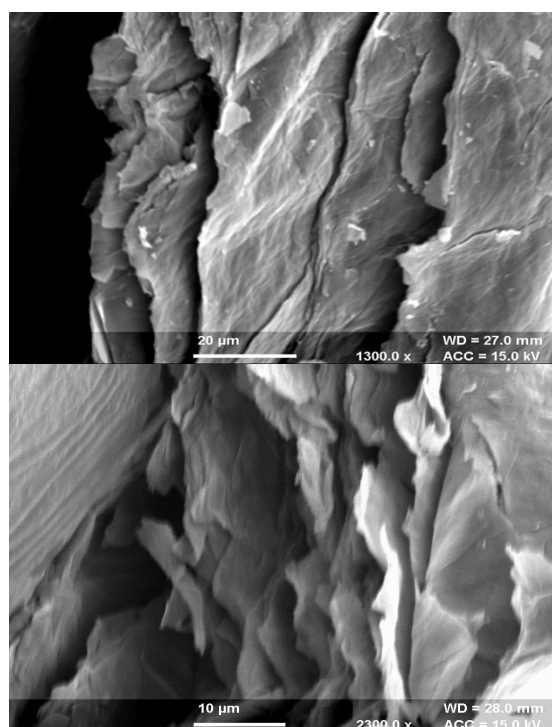

Fig. S2 FESEM images of graphite flakes

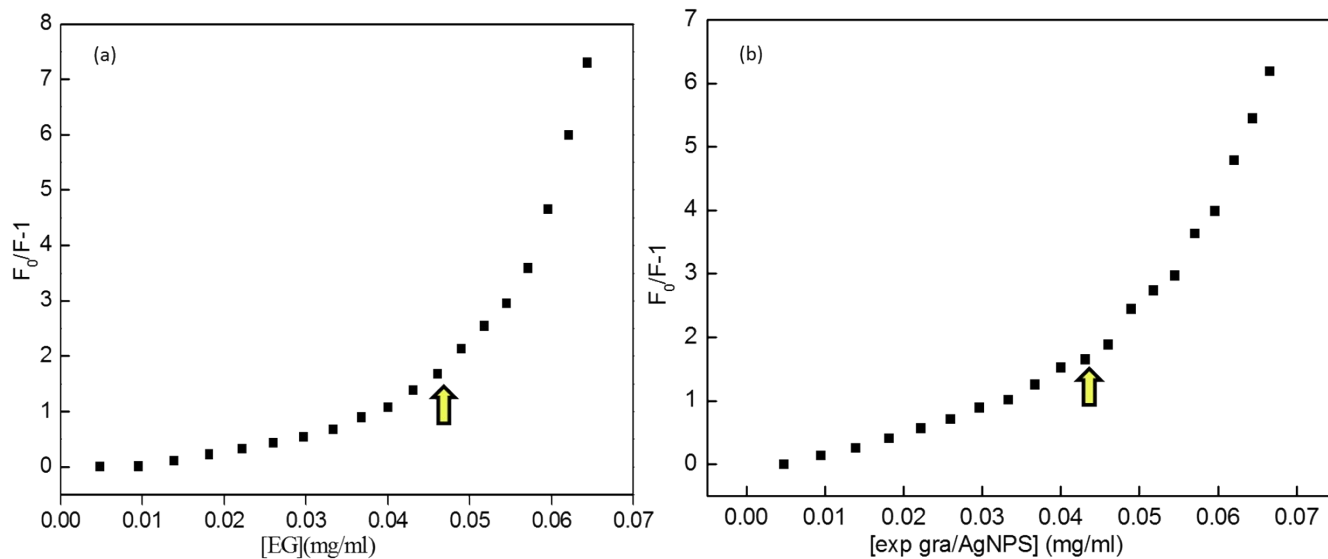

**Fig. S3 (a) Stern-Volmer plot of Rhod B-EG system (b) Rhod B-EG/AgNPs system at 303.15 K**
